# Supplementary material for: High-throughput analysis of adaptation using barcoded strains of Saccharomyces cerevisiae
Source: PubMed Central journal article supplement (PMC7571412; doi:10.7717/peerj.10118), 2020-10-16

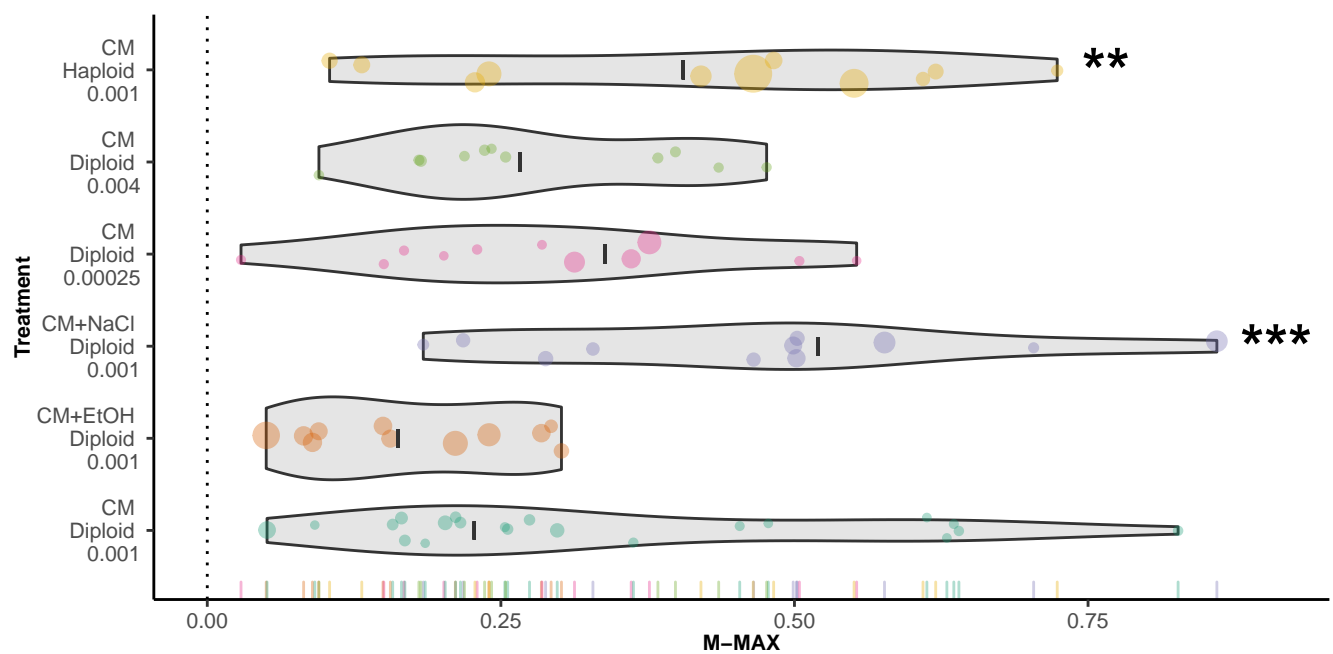

Supplement: peerj-08-10118-s004.pdf [file peerj-08-10118-s004.pdf]
