# Supplementary material for: High-throughput analysis of adaptation using barcoded strains of Saccharomyces cerevisiae
Source: PeerJ journal article supplement (doi:10.7717/peerj.10118), 2020-10-16

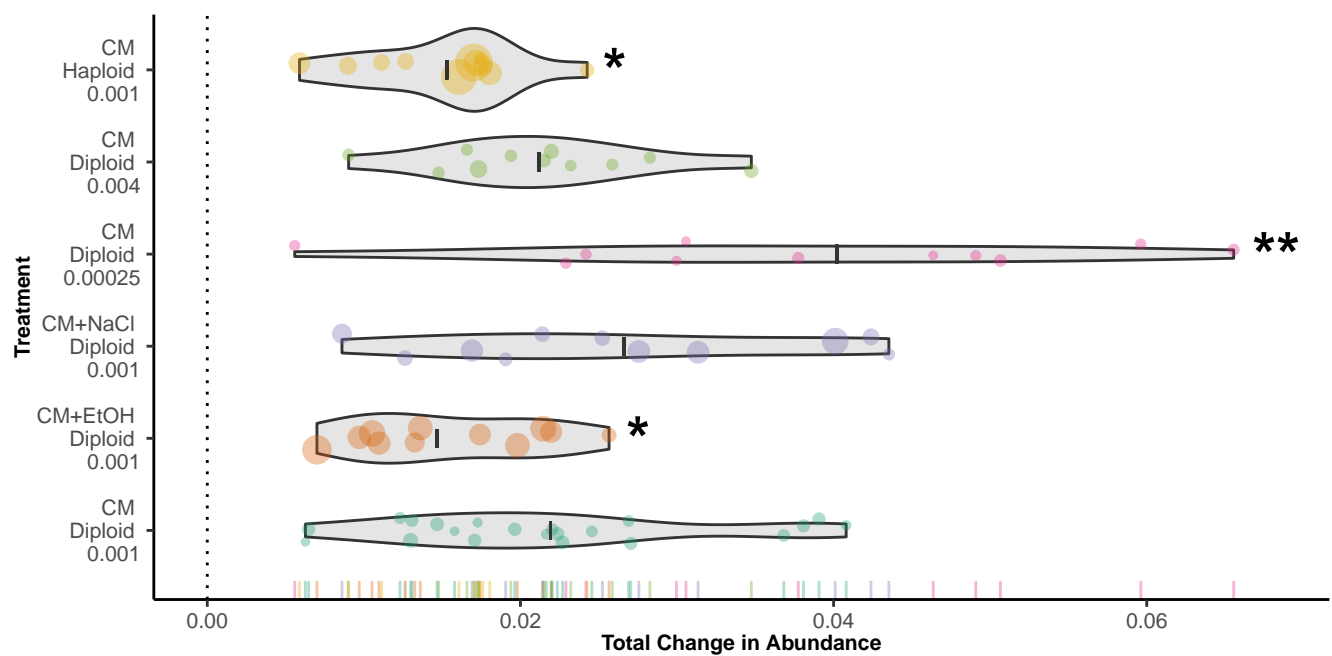

Supplement: Supplemental_Figure_S9.pdf [file Supplemental_Figure_S9.pdf]
